# Supplementary material
Source: PubMed Central journal article supplement (PMC2767222)
Supplement: neo1111_1208SD1.pdf [file neo1111_1208SD1.pdf]

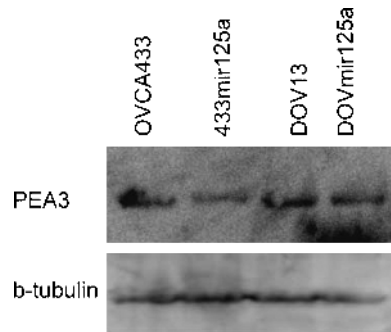

**Figure W1.** PEA3 expression in ovarian cancer cell lines. Western blot analysis on OVCA433, 433mir125a, DOV13, and DOVmir125a cells for PEA3 and  $\beta$ -tubulin. The 433mir125a and DOVmir125a cells are cells overexpressing miR-125a.

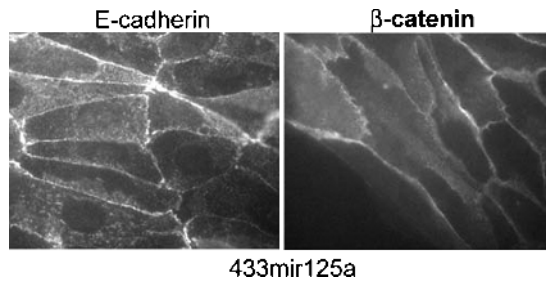

**Figure W2.** Adherens junctions in OVCA433 cells overexpressing miR-125a. Immunofluorescence performed for E-cadherin and  $\beta$ -catenin on 433mir125a cells demonstrates the presence of E-cadherin containing adherens junctions.
